# Supplementary material for: Cellular internalisation, bioimaging and dark and photodynamic cytotoxicity of silica nanoparticles doped by {Mo6I8}4+ metal clusters
Source: Royal Society of Chemistry journal article supplement (doi:10.1039/c6tb00723f), 2016-01-01
Supplement: c6tb00723f1.pdf [file c6tb00723f1.pdf]

## Supporting Information

### Cellular internalisation, bioimaging and dark and photodynamic cytotoxicity of silica nanoparticles doped by $\{\text{Mo}_6\text{I}_8\}^{4+}$ metal cluster

Anastasiya O. Solovieva,<sup>a</sup> Yuri A. Vorotnikov,<sup>b</sup> Kristina E. Trifonova,<sup>a</sup> Olga A. Efremova,<sup>c</sup> Anna A. Krasilnikova,<sup>a</sup> Konstantin A. Brylev,<sup>b,d</sup> Elena V. Vorontsova,<sup>e</sup> Pavel A. Avrorov,<sup>f</sup> Lidiya V. Shestopalova,<sup>d</sup> Alexander F. Poveshchenko,<sup>a</sup> Yuri V. Mironov<sup>b,d</sup> and Michael A. Shestopalov<sup>a,b,d\*</sup>

*Scientific Institute of Clinical and Experimental Lymphology, 2 Timakovast., 630060 Novosibirsk, Russian Federation*

*Nikolaev Institute of Inorganic Chemistry SB RAS, 3 Acad. Lavrentievave., 630090 Novosibirsk, Russian Federation*

*Department of Chemistry, University of Hull, Cottingham Road, HU6 7RX, Hull, UK*

*Novosibirsk State University, 2 Pirogovast., 630090 Novosibirsk, Russian Federation*

*The Institute of Molecular Biology and Biophysics, 2/12 Timakovast., 630117 Novosibirsk, Russian Federation*

*Scientific Research Institute of Physiology and Basic Medicine, 4 Timakovast., 630117 Novosibirsk, Russia Federation.*

\*Corresponding Authors:

Michael A. Shestopalov

Tel. +7-383-330-92-53, Fax +7-383-330-94-89

e-mail: [shtopy@niic.nsc.ru](mailto:shtopy@niic.nsc.ru)

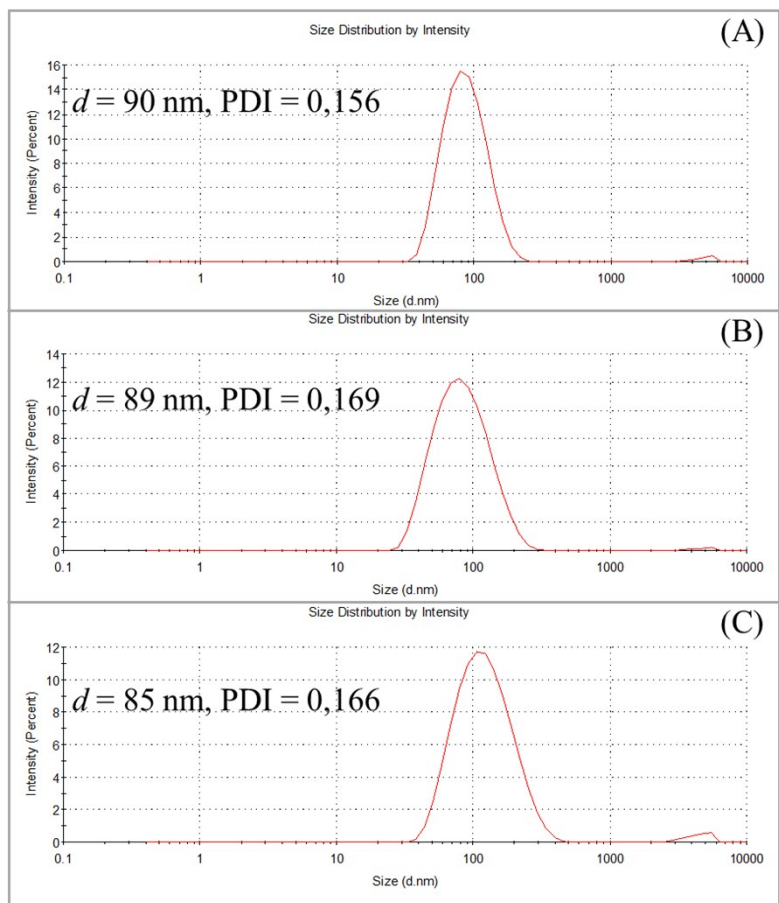

**Figure S1.** DLS data of neat  $\text{SiO}_2$  (A),  $\{\text{Mo}_6\text{I}_8\}^{0.001}@\text{SiO}_2$  (B) and  $\{\text{Mo}_6\text{I}_8\}^{0.01}@\text{SiO}_2$  (C)

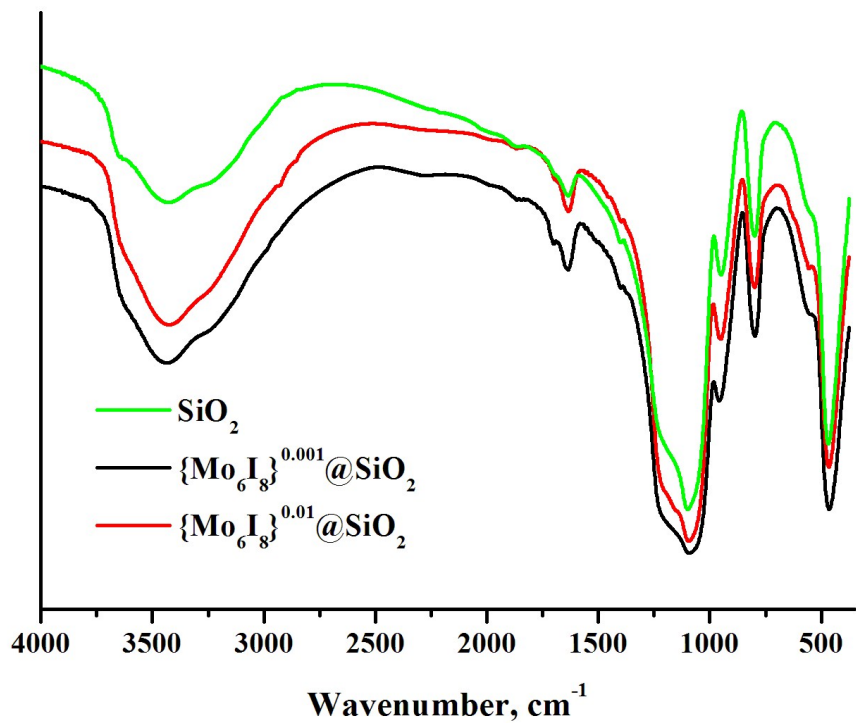

**Figure S2.** FTIR data of SNPs

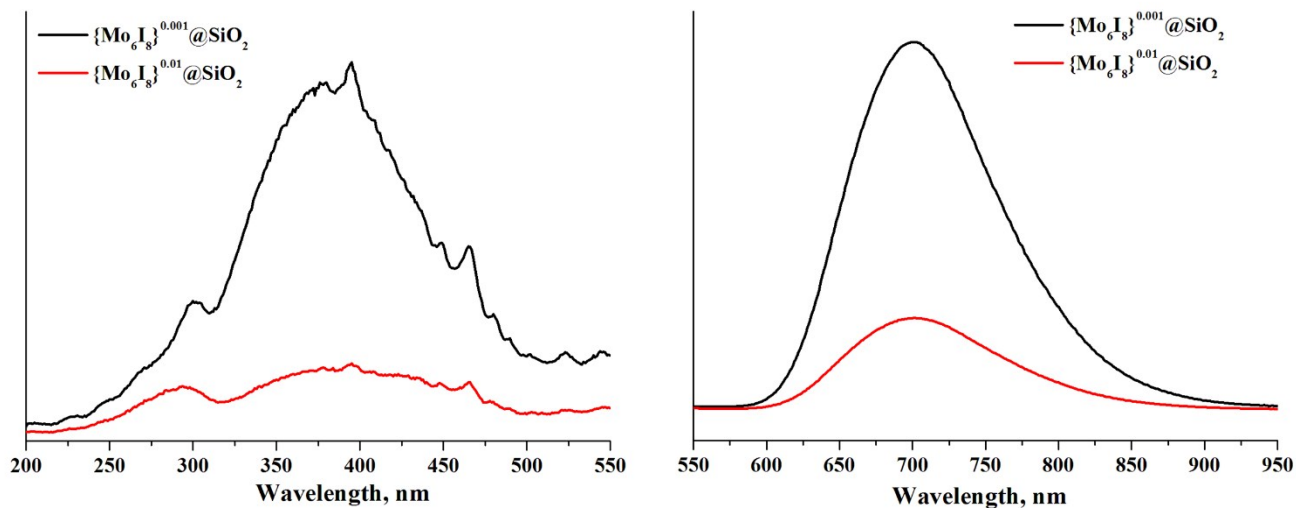

**Figure S3.** Excitation (left) and emission (right) spectra of SNPs

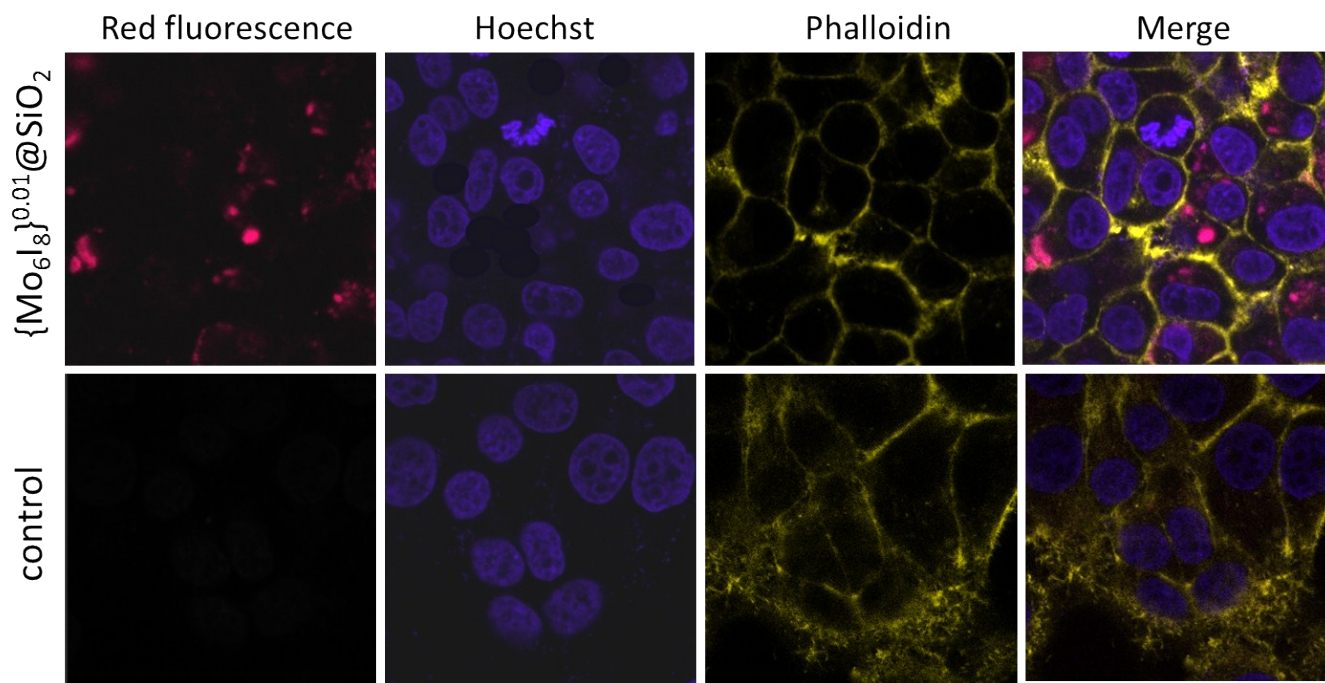

**Figure S4.** Fluorescent confocal images of cellular uptake and distribution of  $\{\text{Mo}_6\text{I}_8\}^{0.01}@\text{SiO}_2$  in Hep-2 cells. Yellow colour show F-actin stained by Alexa Fluore-532 phalloidin. Cell nucleus were stained by DAPI. Hep-2 cells were seeded on slides ( $1.5 \times 10^5$  cells/slide) and incubated overnight at 37 °C under a 5%  $\text{CO}_2$  atmosphere. The medium was then replaced with a fresh medium containing 0.1 mg/mL of  $\{\text{Mo}_6\text{I}_8\}^{0.01}@\text{SiO}_2$  and incubated for 2 h. The cells incubated in the absence of SNPs were used as a control. Finally, the cells were washed twice with PBS, fixed in 4% paraformaldehyde, and washed thrice with PBS. Then the cells were permeabilised with 0.1% Triton X-100 in PBS for 5 min at room temperature, and washed thrice with PBS. F-actin was then stained with Alexa Fluore-532 phalloidin for 15 min at room temperature, washed thrice with PBS. Coverslips were washed thrice with PBS and water, and sealed using mounting medium for fluorescence with DAPI. Cells was visualised by using a Zeiss LSM 510 confocal microscope (Carl Zeiss Inc., Jena, Germany) equipped with a laser diode (405 nm) for fluorescence and with a 100× oil immersion objective. The images were obtained and analysed with ZEN 2009 software. Each experiment was repeated three times on separate days.



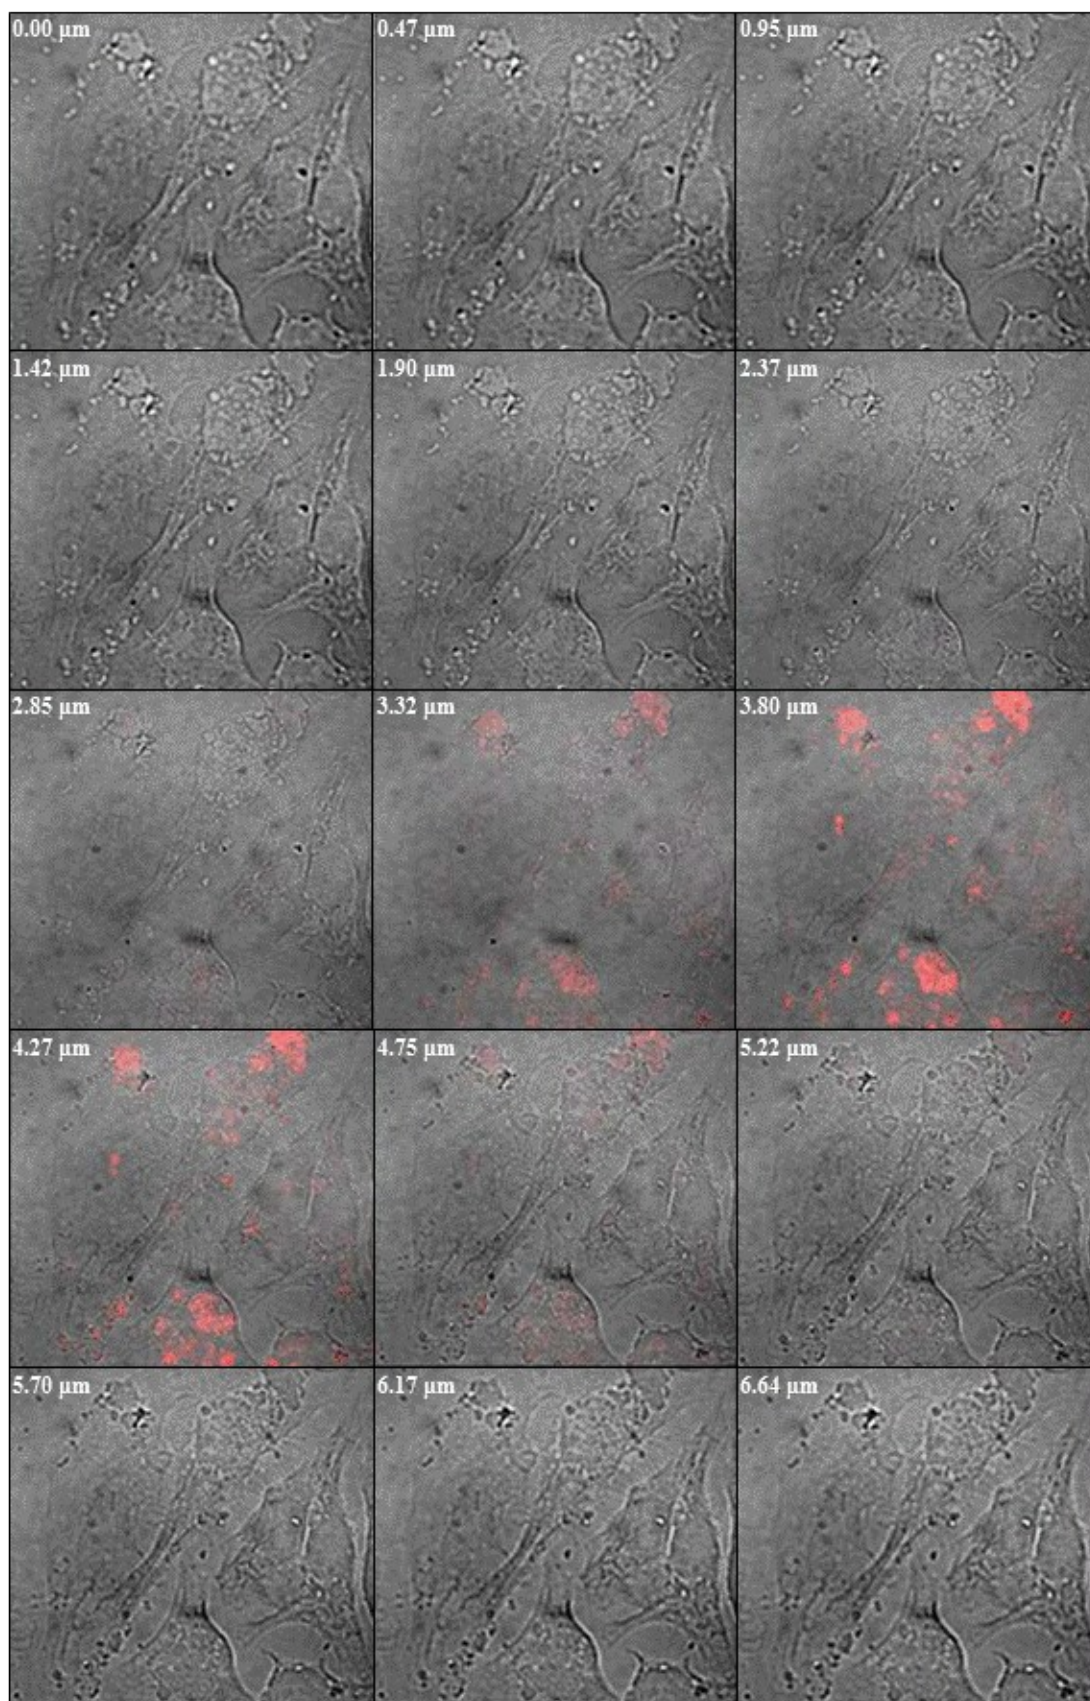

**Figure S5.Z** series of confocal images of Hep-2 cell incubated with 0.1 mg/mL of  $\{\text{Mo}_6\text{I}_8\}^{0.001}@\text{SiO}_2$  for 24 h.

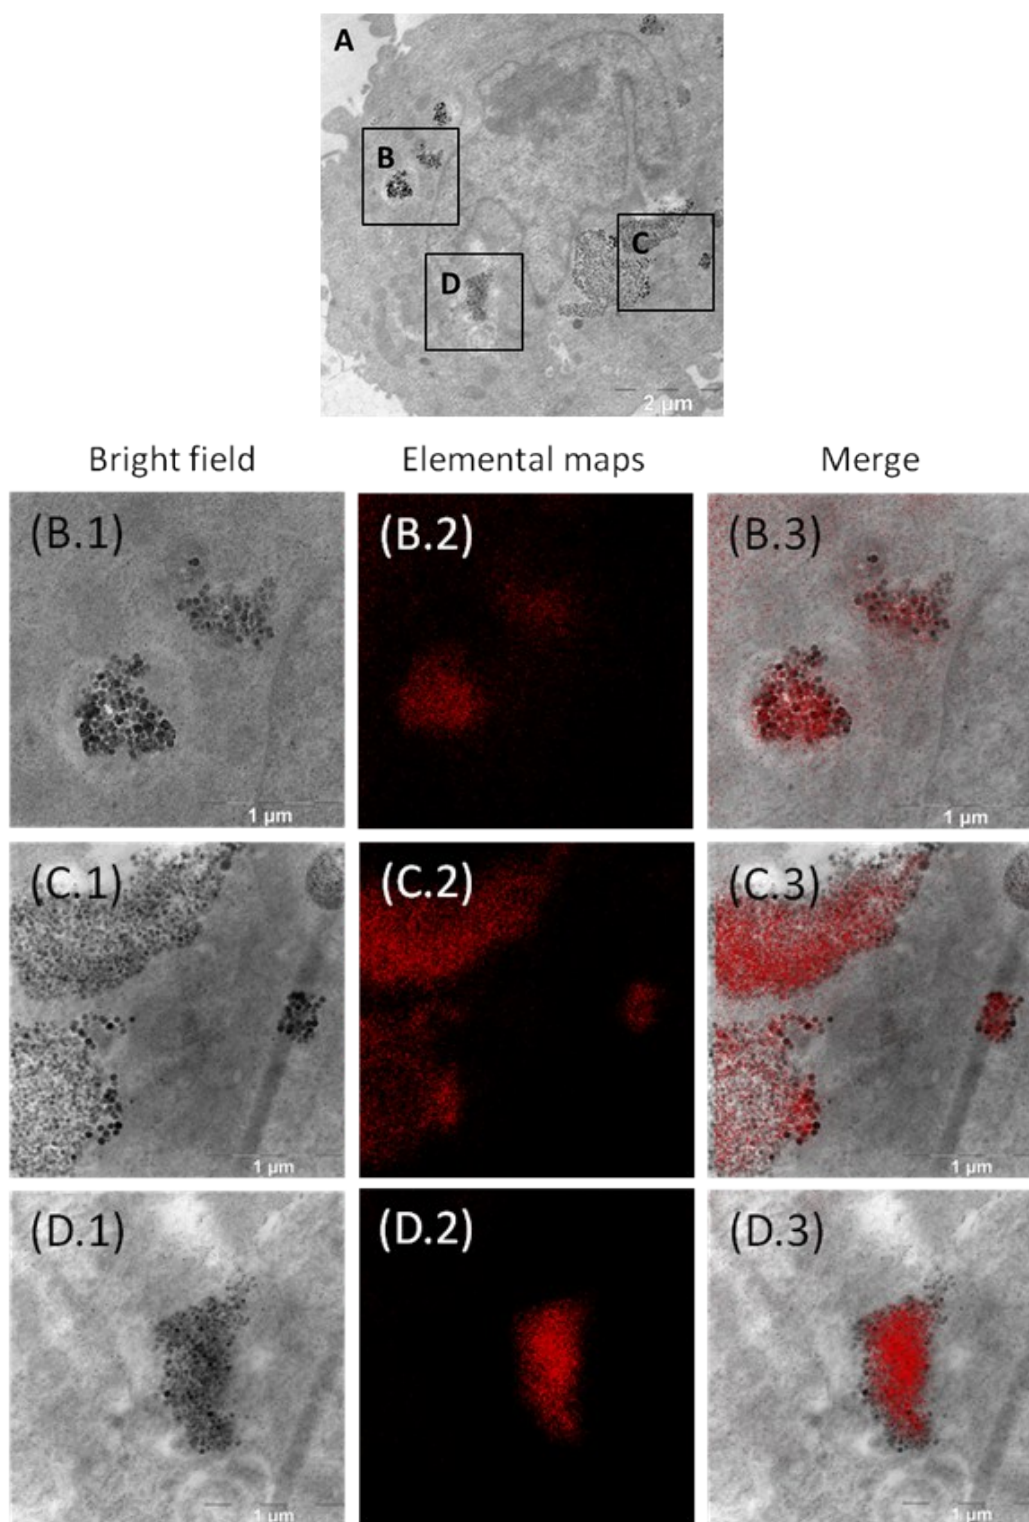

**Figure S6.** TEM images of a Hep-2 cell after incubation with 0.1 mg/mL neat SNPs for 24 hours at 37°C. **A)** General view of Hep-2 cell. **B), C), D)** Higher magnification image of the area indicated by the box B, C, D in A, respectively. Neat SNPs in endosome are indicated by the asterisk, free SNPs in cytoplasm are indicated by the arrows. **B.2) C.2) D.2)** Si L2,3-edge, EF-TEM elemental map shows concentrated regions of silicon and **B.3) C.3) D.3)** demonstrates the localisation of SNPs in the cell.



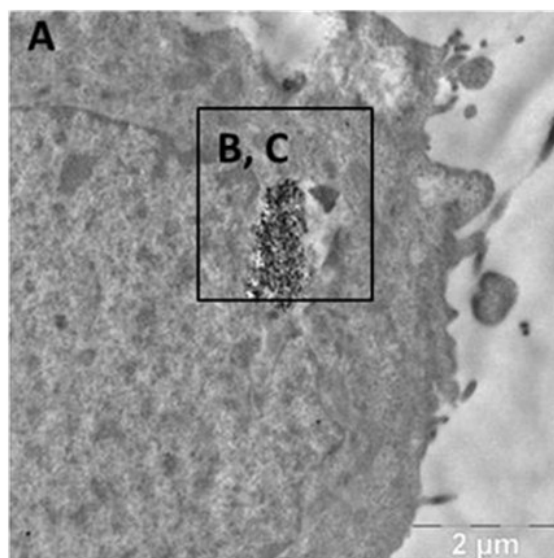

Bright field

Elemental maps

Merge

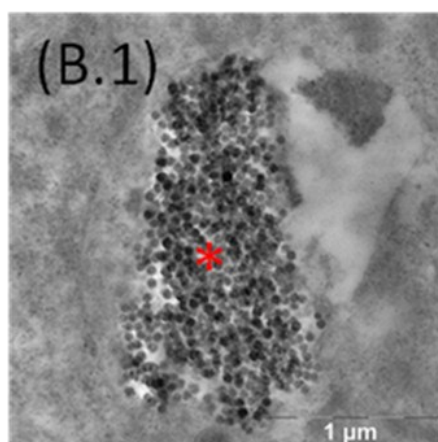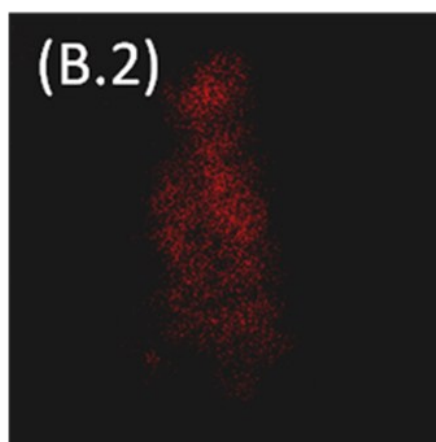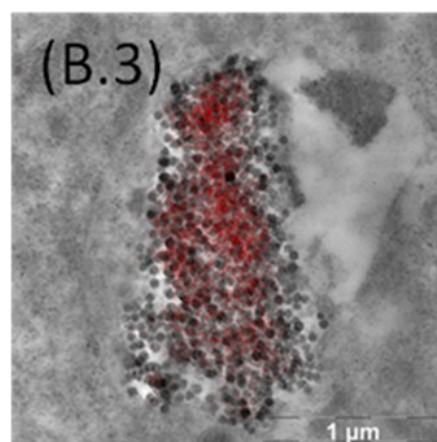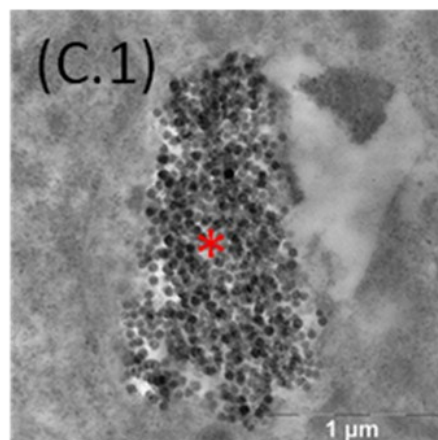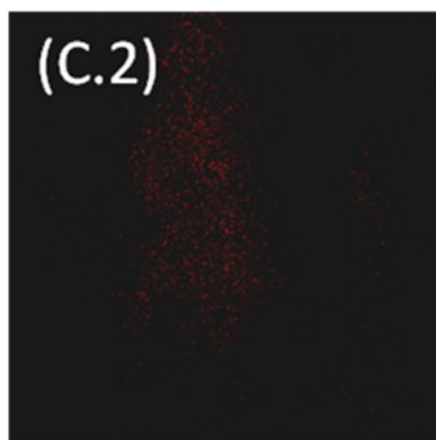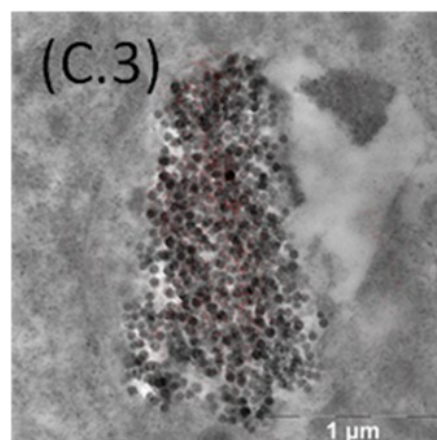

**Figure S7.** TEM image of a Hep-2 cell after incubation with 0.1 mg/mL  $\{\text{Mo}_6\text{I}_8\}^{0.01}\text{@SiO}_2$  for 24 hours at 37°C. **A)** General view of Hep-2 cell. **B), C)** Higher magnification image of the area indicated by the box **B, C** in **A)**. SNPs in endosome are indicated by the asterisk. **B.2)** Si L2,3-edge, EF-TEM elemental map shows concentrated regions of silicon and **C.2)** Mo L2,3-edge, EF-TEM elemental map shows concentrated regions of molybdenum. **B.3)** **C.3)** clearly demonstrates the localisation of SNPs in the cell. Similarity between elemental maps for Si (**B.2**) and Mo (**C.2**) confirms that we visualised  $\{\text{Mo}_6\text{I}_8\}^{0.01}\text{@SiO}_2$ .

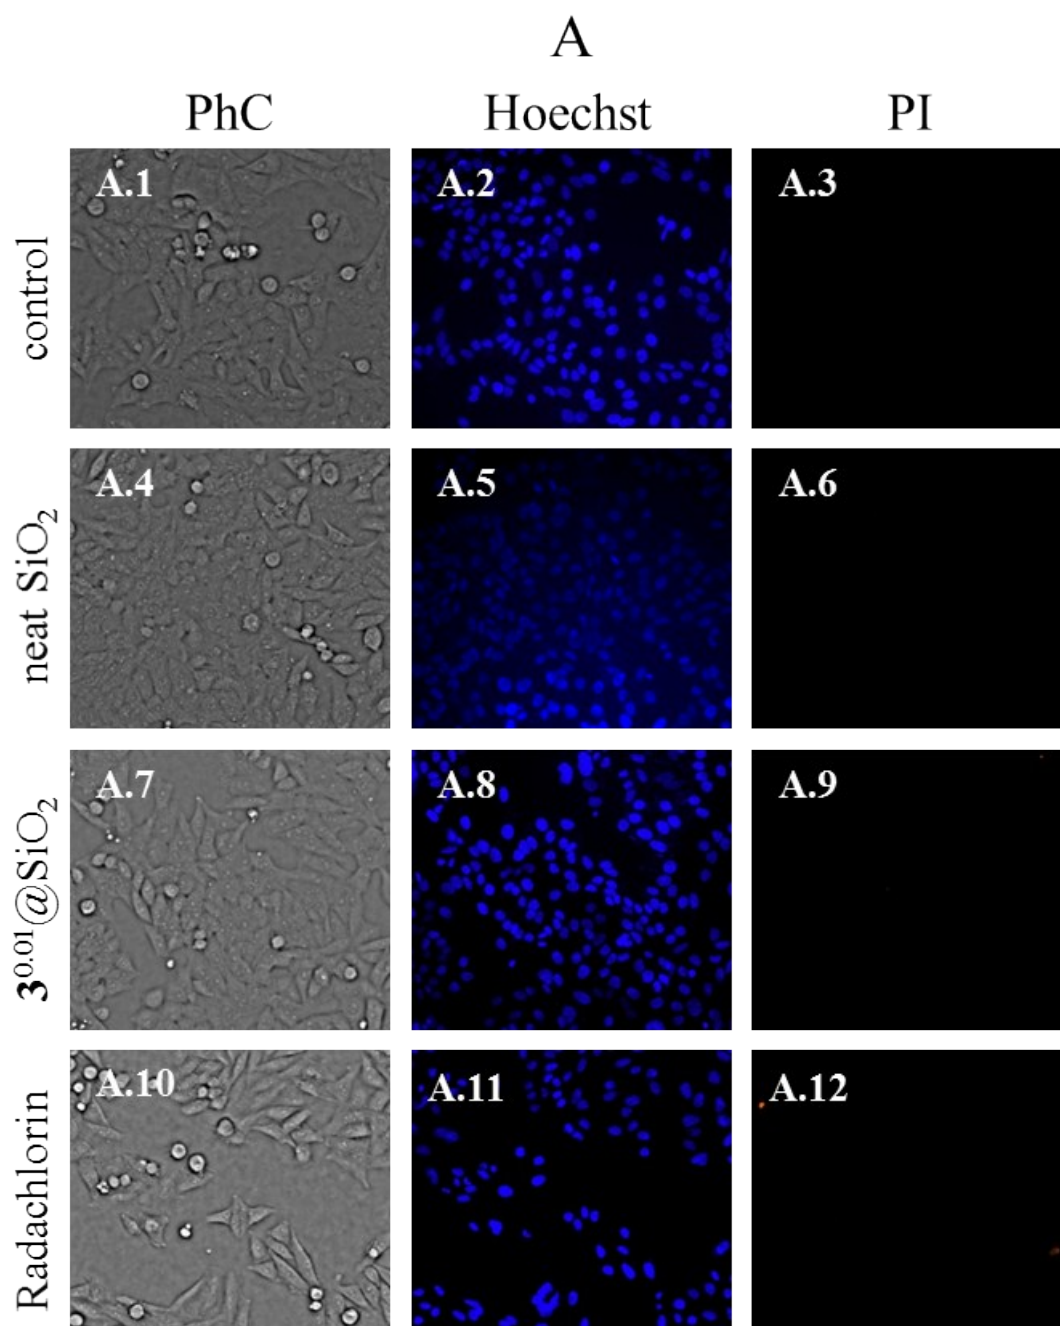

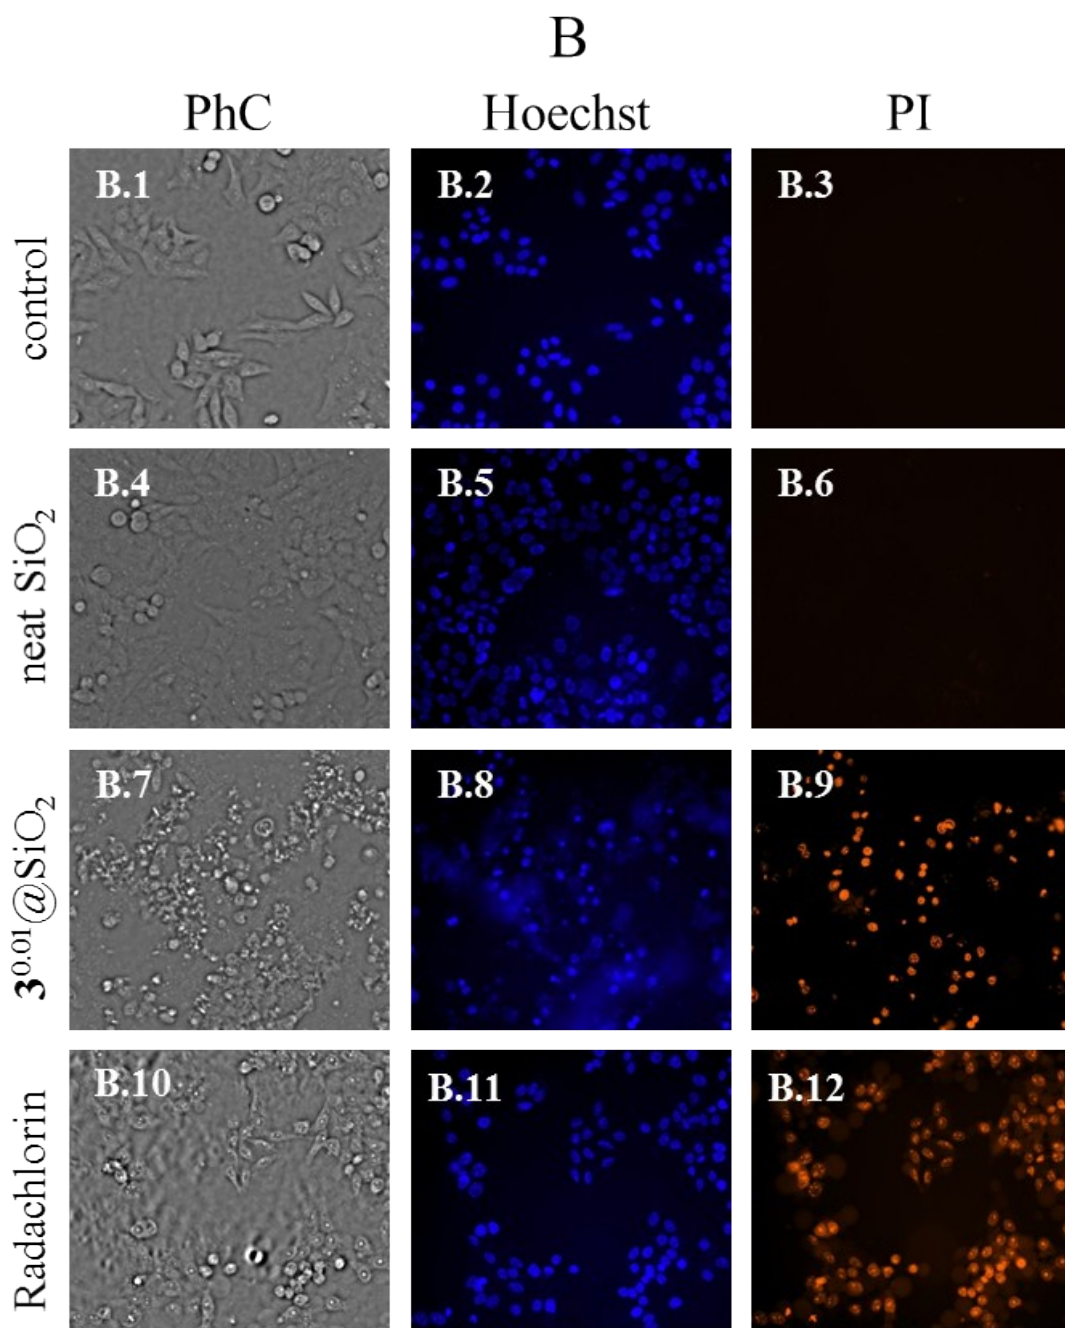

**Figure S8.** Effect of neat SiO<sub>2</sub>, {Mo<sub>6</sub>I<sub>8</sub>}<sup>0.01</sup>@SiO<sub>2</sub> in concentration 0.2 mg/ml and Radachlorinin concentration 61 µg/ml on Hep-2 cells before (A) and after (B) photoirradiation. Cells detected with dual staining of Hoechst 33342 and PI.



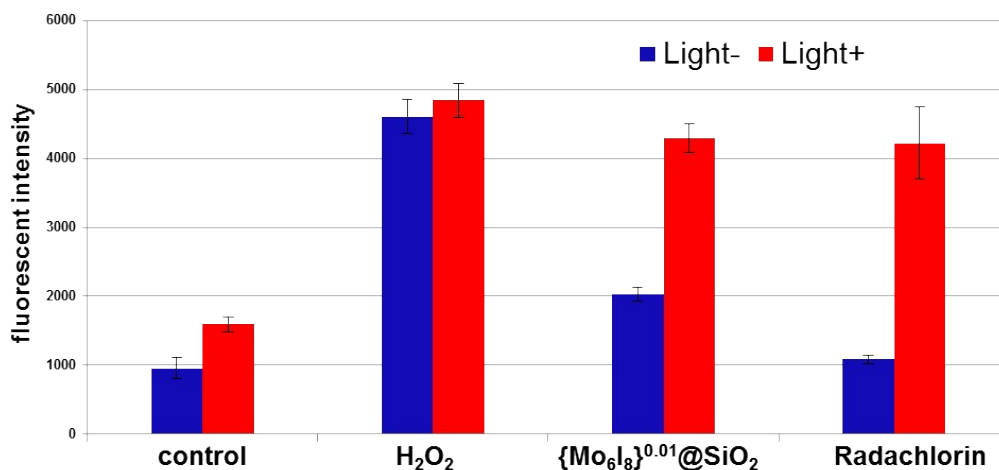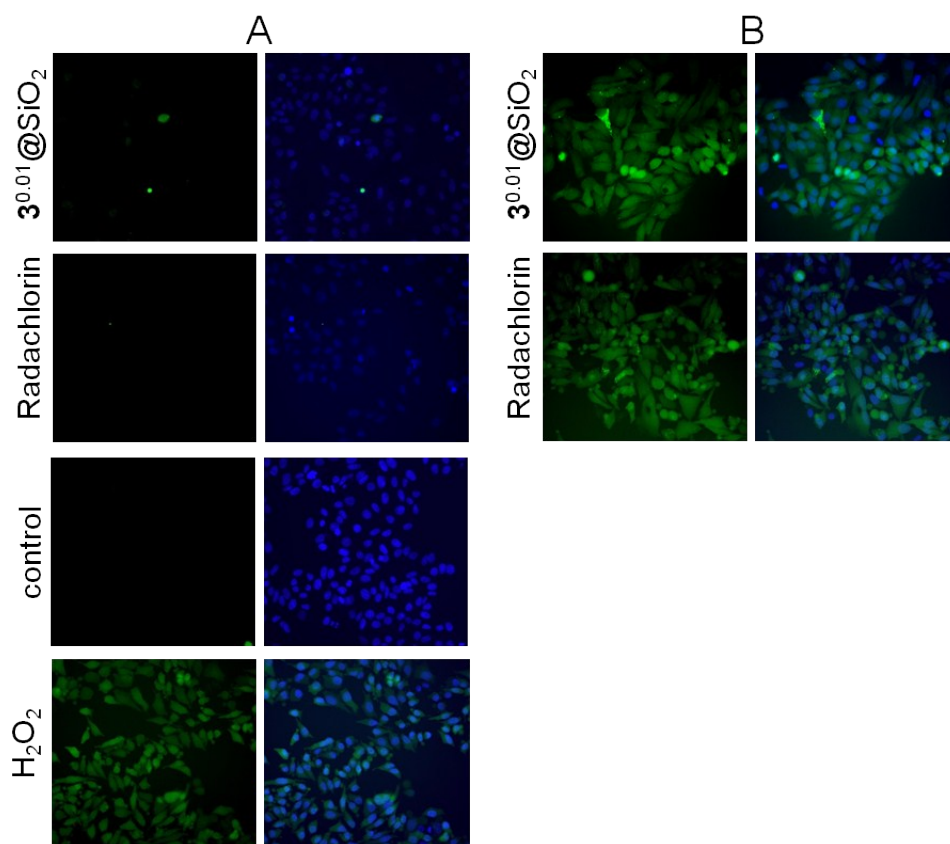

**Figure S9.** Detection and quantification of ROS levels induced by {Mo<sub>6</sub>I<sub>8</sub>}<sup>0.01</sup>@SiO<sub>2</sub> in concentration 0.2 mg/mL and Radachlorin in concentration 0.03 mg/mL on Hep-2 cells before (I. blue columns, II. A) and after (I. red columns, II. B) photoirradiation. To monitor the intracellular ROS, we used cell-permeable oxidation sensitive fluorescent probes 5,6-carboxy-2',7'-dichlorofluoresceindiacetate (DCFH-DA) (Sigma-Aldrich). Hep-2 cells were seeded in 96- well plate ( $1 \times 10^4$  cells/well) and incubated overnight at 37 °C under a 5% CO<sub>2</sub> atmosphere. The medium was then replaced with a fresh medium containing 0.2 mg/mL of {Mo<sub>6</sub>I<sub>8</sub>}<sup>0.01</sup>@SiO<sub>2</sub> and 0.03 mg/mL of Radachlorin and incubated for 2 h. The cells incubated in free media and with 100  $\mu$ M H<sub>2</sub>O<sub>2</sub> were used as a negative and positive control respectively. The cells were pre-incubated with 10  $\mu$ M DCFH-DA in HEPES for 10 min at 37°C and then were irradiated with 500 W halogen lamp ( $\lambda \geq 400$  nm) for 10 min. Cell nucleus were stained by DAPI. IN Cell Analyzer 2200 (GE Healthcare, UK) was used to perform automatic imaging of four fields per well under 200X magnification, in brightfield and fluorescence channels. The images produced were used to analyse DCF fluorescent intensity DCF positive cells among the whole population using the IN Cell Investigator software (GE Healthcare, UK). Data represent the mean DCF fluorescence intensity. Results are means  $\pm$  SD.
